# Supplementary material for: Incidence of depression and depressive symptoms and their predictive factors in community-dwelling older adults: a systematic review and meta-analysis protocol
Source: PubMed Central journal article supplement — BMJ Open. 2021 Jul 20;11(7):e052147. doi: 10.1136/bmjopen-2021-052147 (PMC8292800; doi:10.1136/bmjopen-2021-052147), 2021-07-20
Supplement: bmjopen-2021-052147.draft_revisions.pdf [file bmjopen-2021-052147.draft_revisions.pdf]

# BMJ Open

BMJ Open is committed to open peer review. As part of this commitment we make the peer review history of every article we publish publicly available.

When an article is published we post the peer reviewers' comments and the authors' responses online. We also post the versions of the paper that were used during peer review. These are the versions that the peer review comments apply to.

The versions of the paper that follow are the versions that were submitted during the peer review process. They are not the versions of record or the final published versions. They should not be cited or distributed as the published version of this manuscript.

BMJ Open is an open access journal and the full, final, typeset and author-corrected version of record of the manuscript is available on our site with no access controls, subscription charges or pay-per-view fees (<http://bmjopen.bmj.com>).

If you have any questions on BMJ Open's open peer review process please email [info.bmjopen@bmj.com](mailto:info.bmjopen@bmj.com)

# BMJ Open

## PREVALENCE AND INCIDENCE OF DEPRESSIVE SYMPTOMS AND DEPRESSION IN COMMUNITY-DWELLING OLDER ADULTS: A SYSTEMATIC REVIEW AND META-ANALYSIS PROTOCOL

|                               |                                                                                                                                                                                                                                                                                                                                                                                                                                                                                                                                       |
|-------------------------------|---------------------------------------------------------------------------------------------------------------------------------------------------------------------------------------------------------------------------------------------------------------------------------------------------------------------------------------------------------------------------------------------------------------------------------------------------------------------------------------------------------------------------------------|
| Journal:                      | <i>BMJ Open</i>                                                                                                                                                                                                                                                                                                                                                                                                                                                                                                                       |
| Manuscript ID                 | bmjopen-2021-052147                                                                                                                                                                                                                                                                                                                                                                                                                                                                                                                   |
| Article Type:                 | Protocol                                                                                                                                                                                                                                                                                                                                                                                                                                                                                                                              |
| Date Submitted by the Author: | 07-Apr-2021                                                                                                                                                                                                                                                                                                                                                                                                                                                                                                                           |
| Complete List of Authors:     | Brasileiro, LÍzie Emanuelle Eulálio; Federal University of Rio Grande do Norte, Multicampi School of Medical Sciences de Medeiros Paiva, AÍlla Loreнна; Federal University of Rio Grande do Norte, Multicampi School of Medical Sciences Dantas de Medeiros, Maria Yasmin; Federal University of Rio Grande do Norte, Multicampi School of Medical Sciences Jerez-Roig, Javier; Federal University of Rio Grande do Norte, Department of Collective Health Souza, Dyego; Universidade Federal do Rio Grande do Norte, Coletive health |
| Keywords:                     | Depression & mood disorders < PSYCHIATRY, Old age psychiatry < PSYCHIATRY, EPIDEMIOLOGY, GERIATRIC MEDICINE                                                                                                                                                                                                                                                                                                                                                                                                                           |
|                               |                                                                                                                                                                                                                                                                                                                                                                                                                                                                                                                                       |

SCHOLARONE™  
Manuscripts

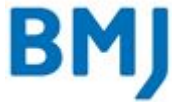

I, the Submitting Author has the right to grant and does grant on behalf of all authors of the Work (as defined in the below author licence), an exclusive licence and/or a non-exclusive licence for contributions from authors who are: i) UK Crown employees; ii) where BMJ has agreed a CC-BY licence shall apply, and/or iii) in accordance with the terms applicable for US Federal Government officers or employees acting as part of their official duties; on a worldwide, perpetual, irrevocable, royalty-free basis to BMJ Publishing Group Ltd ("BMJ") its licensees and where the relevant Journal is co-owned by BMJ to the co-owners of the Journal, to publish the Work in this journal and any other BMJ products and to exploit all rights, as set out in our [licence](#).

The Submitting Author accepts and understands that any supply made under these terms is made by BMJ to the Submitting Author unless you are acting as an employee on behalf of your employer or a postgraduate student of an affiliated institution which is paying any applicable article publishing charge ("APC") for Open Access articles. Where the Submitting Author wishes to make the Work available on an Open Access basis (and intends to pay the relevant APC), the terms of reuse of such Open Access shall be governed by a Creative Commons licence – details of these licences and which [Creative Commons](#) licence will apply to this Work are set out in our licence referred to above.

Other than as permitted in any relevant BMJ Author's Self Archiving Policies, I confirm this Work has not been accepted for publication elsewhere, is not being considered for publication elsewhere and does not duplicate material already published. I confirm all authors consent to publication of this Work and authorise the granting of this licence.

1  
2  
3 PREVALENCE AND INCIDENCE OF DEPRESSIVE SYMPTOMS AND  
4 DEPRESSION IN COMMUNITY-DWELLING OLDER ADULTS: A SYSTEMATIC  
5 REVIEW AND META-ANALYSIS PROTOCOL  
6  
7  
8

9 Lízie Emanuelle Eulálio Brasileiro<sup>1,2</sup>, Aílla Lorena de Medeiros Paiva<sup>2</sup>, Maria Yasmin  
10 Dantas de Medeiros<sup>2</sup>, Javier Jerez-Roig<sup>1,3</sup>, Dyego Leandro Bezerra de Souza<sup>1,3,4</sup>.

11  
12 **Corresponding Author:** Javier Jerez-Roig, javier.jerez@uvic.cat  
13

14 **Author Affiliations:**

15  
16 <sup>1</sup> Postgraduate Programme in Collective Health, Federal University of Rio Grande do  
17 Norte (UFRN), Natal-RN, Brazil

18  
19 <sup>2</sup> Multicampi School of Medical Sciences, Federal University of Rio Grande do Norte  
20 (UFRN)

21  
22 <sup>3</sup> Research group on Methodology, Methods, Models and Outcomes of Health and Social  
23 Sciences (M<sub>3</sub>O). Faculty of Health Sciences and Welfare. Centre for Health and Social  
24 Care Research (CESS). University of Vic-Central University of Catalonia (UVic-UCC).  
25

26  
27 <sup>4</sup> Department of Collective Health, Graduate Programme in Collective Health, Federal  
28 University of Rio Grande do Norte, Natal, Brazil  
29

30  
31 **ABSTRACT**

32  
33 **Introduction** Faced with the continuous growth in the number of older people at a global  
34 level, some concerns are raised about the way people age. Health conditions such as  
35 depressive symptoms and depression have a direct or indirect impact on the quality of life  
36 of this population segment. The objective of this study is to verify the occurrence of the  
37 various presentations of the depressive spectrum in the community-dwelling older  
38 population, as well as to analyze the associated and predictive factors.

39  
40 **Methods and analysis** This systematic review and meta-analysis protocol follows the  
41 recommendation of the Preferred Reporting Items for Systematic Reviews and Meta-  
42 Analyses Protocols. Searches will be conducted in *PubMed*, *Web of Science*, *Scopus*,  
43 *Lilacs*, *Scielo*, and *Cochrane* databases, as well as grey literature. The search strategy  
44 involves terms related to aging and the depressive spectrum found in observational  
45 studies, either sectional or longitudinal. There will be no language restriction and the  
46 material included will be the ones whose publications took place until December 2020.

47  
48 **Ethics and dissemination** Formal ethical approval is not required on this research, since  
49 it only aims secondary data. Our findings may be disseminated to fill in the gaps and  
50 guide the production of more effective public policies aimed at a more adequate care to  
51 the older population. The search process began in January 2021 and it is expected that all  
52 stages of the review will be completed by November 30, 2021.  
53  
54  
55  
56

57  
58 **Strengths and limitations of this study**

- 59  
60
  - It highlights the importance of measuring data on prevalence and incidence of depressive symptoms and depression in the community-dwelling older global population.

- |    |  |
|----|--|
| 1  |  |
| 2  |  |
| 3  |  |
| 4  |  |
| 5  |  |
| 6  |  |
| 7  |  |
| 8  |  |
| 9  |  |
| 10 |  |
| 11 |  |
| 12 |  |
| 13 |  |
| 14 |  |
| 15 |  |
| 16 |  |
| 17 |  |
| 18 |  |
| 19 |  |
| 20 |  |
| 21 |  |
| 22 |  |
| 23 |  |
| 24 |  |
| 25 |  |
| 26 |  |
| 27 |  |
| 28 |  |
| 29 |  |
| 30 |  |
| 31 |  |
| 32 |  |
| 33 |  |
| 34 |  |
| 35 |  |
| 36 |  |
| 37 |  |
| 38 |  |
| 39 |  |
| 40 |  |
| 41 |  |
| 42 |  |
| 43 |  |
| 44 |  |
| 45 |  |
| 46 |  |
| 47 |  |
| 48 |  |
| 49 |  |
| 50 |  |
| 51 |  |
| 52 |  |
| 53 |  |
| 54 |  |
| 55 |  |
| 56 |  |
| 57 |  |
| 58 |  |
| 59 |  |
| 60 |  |
- To the best of our knowledge, this is the first systematic review and meta-analysis to reveal data on incidence data and risk factors of the depressive spectrum in community-dwelling older adults, without temporal limits.
  - This research adheres to the Preferred Reporting Items for Systematic reviews and Meta-Analyses guidelines for protocols (PRISMA-P).
  - Heterogeneous data obtained for the depressive spectrum, from clinically significant symptoms of depression obtained by scales and clinical diagnosis of depression, may limit the performance of quantitative meta-analysis.

## INTRODUCTION

The number of people aged 65 and over, according to a United Nations report,<sup>1</sup> is expected to increase from 9% in 2019 to 16% in 2050. In addition to these projections, the rapid aging of the population is likely to continue until the middle of the 21st century<sup>2</sup>, which entails a greater need for societies to adapt. Such demographic changes demand a better dimensioning of the dynamics of aging, which includes an understanding of the relationship between greater longevity and the qualitative aspect of experiences. Studies show an opposite relationship: the longer one lives, the more difficult life experiences can be due to the progressive loss of physical, mental, and cognitive integrity.<sup>3 4</sup>

It is observed a tendency of growth in the prevalence of multimorbidity with the increase of age,<sup>5</sup> which is related to repercussions in the quality of life and functionality.<sup>6</sup> Little is known about the relationship between multimorbidity and depression. It has been noticed that people with multimorbidity present a two- to three- fold increase in the chance of having depression when compared to people who do not have it<sup>7</sup> and that depression seems to play a central role in the patterns of multimorbidity<sup>8</sup>.

Regarding depression, the World Health Organization<sup>9</sup> positions it as the single largest contributor to disability, besides its direct relationship with suicide deaths. Depression in the older population is associated with an increased risk of mortality,<sup>10</sup> along with the impact on functional capacity, fragility<sup>11</sup> and quality of life,<sup>12 13</sup> being considered as the single largest contributor to non-fatal health loss.<sup>9</sup> Among the age groups, a peak in the frequency of depression was detected between the age of 55 and 74 years,<sup>9</sup> which affects 7.5% of women and 5.5% of men, worldwide, a percentage that exceeds the other ages.

Clinical characteristics of depression include both psychological symptoms - sadness, lack of energy or decreased ability to feel pleasure - and physical and neurovegetative symptoms - such as fatigue, changes in sleep and appetite.<sup>14</sup> This range of symptoms is associated with neurochemical changes of a polygenic nature,<sup>15</sup> as well

1  
2  
3 as more subjective factors that occur throughout life, such as bereavements and losses,  
4 individual coping capacity, social support, and loneliness.<sup>9 16 17</sup> This heterogeneous  
5 profile of the clinical manifestation of depression makes its study complex, especially  
6 when so many forms of presentation can occur.  
7  
8  
9

10  
11 When discussing depression in the scientific literature, particularly when  
12 conducting epidemiological studies, depression can take on several different  
13 presentations. The way depression has been researched entails a great variability in  
14 prevalence and incidence data, which makes the comprehension of the presentations  
15 important to be addressed. This variability in general is due to methodological  
16 differences: 1) how the depressive spectrum can be researched; 2) the housing profile of  
17 the older population.  
18  
19  
20  
21  
22

23  
24 In the first difference, the depressive spectrum is understood as the entire set of  
25 depressive categories, from the mildest depressive symptoms to the most severe, such as  
26 Major Depression.<sup>18 19</sup> There are two ways to research the depressive spectrum, either by  
27 categorization or by dimensional assessment. The categorization is determined by the  
28 American Psychiatric Association, in its 5th edition of the Diagnostic and Statistical  
29 Manual - DSM V,<sup>14</sup> or by the World Health Organization, by the International Code of  
30 Diseases 10th edition, ICD 10<sup>20</sup> in the so-called Depressive Disorders. For dimensionality  
31 assessment, depression scales quantify and establish a cut-off point, revealing what is  
32 known as clinically significant depressive symptoms (CSDS). This type of assessment of  
33 depression seems to have a good representation in its syndromic understanding.<sup>21</sup>  
34  
35  
36  
37  
38  
39  
40

41  
42 It is important to emphasize that both ways of assessing depression are relevant.  
43 Even when evaluating the CSDS, the so-called 'subclinical' depression, there is a tendency  
44 to chronicity and recurrence,<sup>11 22</sup> which entails the psychosocial repercussions.<sup>23</sup> In this  
45 regard, early detection should be a focus at the Primary Health Care level, with a view to  
46 the early establishment of interventions.<sup>23</sup>  
47  
48  
49

50  
51 As for the housing profile of the older population, it is known that those who live  
52 in their own homes have better quality of life indexes<sup>24</sup> and a better level of functionality  
53 than the institutionalized<sup>25 26</sup> or hospitalized<sup>27</sup> older adults. Therefore, a systematic review  
54 focusing on community-dwelling older adults intends to address a preventive perspective,  
55 especially when involving studies of incidence and assessment of predictive factors of  
56 depression.  
57  
58  
59  
60

Notwithstanding the review research carried out in 2003, which sought to evaluate risk factors for depression,<sup>28</sup> there are no updated reviews or meta-analysis whose population focus is community-dwelling adults aged 60 years or over, that particularly bring incidence rates or reveal predictive factors. We hypothesize that sociodemographic factors, health conditions, social support, level of dependence, and stressful events may predict the depressive spectrum in community-dwelling older adults.

The objective of this systematic review will be to ascertain the prevalence and incidence in the various presentations of the depressive spectrum in the community-dwelling older population, as well as to analyze the associated and predictive factors.

## METHODS AND ANALYSIS

### Study design and eligibility criteria

This research is a systematic review that includes observational studies whose research questions should aim to assess the frequency and/or occurrence of depression within its depressive spectrum and its associated or predictive factors. The protocol was registered with the International Prospective Register of Systematic Reviews (PROSPERO) under the registration number CRD42019121616.

As recommended by PRISMA- Preferred Reporting Items for Systematic Reviews and Meta-Analyses,<sup>29</sup> systematic reviews should be guided by the acronym PICO, representing the Participants, Intervention (in our case, we replace it by exposure variables), Comparators, and Outcomes, which can be seen summarized in **table 1**.

**Table 1.** PICO- description

| Abbreviation | Meaning                 | Characteristics                                                                                                      |
|--------------|-------------------------|----------------------------------------------------------------------------------------------------------------------|
| P            | Participants            | Community-dwelling adults $\geq 60$ years old                                                                        |
| I            | Intervention (exposure) | Sociodemographic factors, health conditions, social support, dependency level, stressful events, contextual factors. |
| C            | Comparators             | Group without the exposure variables                                                                                 |
| O            | Outcomes                | Prevalence/incidence data of depression/Clinically significant depressive symptoms                                   |

As defined by the World Health Organization,<sup>30</sup> individuals older than 65 years are considered old in developed countries, while the cut-off point decreases to 60 years old in developing countries. Thus, we will include articles whose population focus should be exclusively older adults, of both sexes, community-dwelling adults aged 60 years or

1  
2  
3 older, i.e., living in a home or residence, even if they live in houses with other older people  
4 or receive specialized care, and therefore are not institutionalized or hospitalized.  
5  
6

7 We will include the primary studies that deal with depression or clinically  
8 significant depressive symptoms. To embrace the nomenclature used for depressive  
9 spectrum, studies that research major depressive episode, major depressive disorder,  
10 unipolar depression, dysthymia, minor depression, subclinical depression, and clinically  
11 significant depressive symptoms (CSDS) will be included. Studies that include bipolar  
12 depression or depression with psychotic symptoms will be excluded. This variable,  
13 related to the depressive spectrum, will be treated as the dependent variable or the primary  
14 outcome.  
15  
16  
17  
18  
19  
20

21 When the included studies are longitudinal, the focus will be on the evaluation of  
22 the predictive factors of depression which will be considered the dependent variable, even  
23 if they bring bidirectional relations with other variables. Regarding language and time,  
24 the team will include all studies that meet these eligibility criteria, with no initial  
25 restriction for languages or time period.  
26  
27  
28  
29  
30

31 Studies that include blood, molecular or chemical element measurements will be  
32 excluded. Studies investigating clinical populations in specific outpatient treatment or  
33 presenting specific diseases will also be excluded.  
34  
35

### 36 **Information source and search strategy**

37  
38  
39 Six health-related databases will be used: PubMed, Web of Science, Scopus,  
40 LILACS (Latin-American and Caribbean Literature on Health Sciences), SciELO  
41 (Scientific Electronic Library Online) and Cochrane. In addition to these bases, materials  
42 from the grey literature will be used, represented by repositories of monographs or theses,  
43 publications in Congresses and Google Scholar.  
44  
45  
46  
47

48 Considering the search strategy, we decided on the association of keywords and  
49 descriptors, with no filter, in English, forming an equation that respected the search form  
50 and technique in each base, according to **Table 2**.  
51  
52  
53

54 **Table 2- Search strategies for each database**

| Databases | General search strategy |
|-----------|-------------------------|
|-----------|-------------------------|



|                |                                                                                                                                                                                                                                                                                     |
|----------------|-------------------------------------------------------------------------------------------------------------------------------------------------------------------------------------------------------------------------------------------------------------------------------------|
| PubMed         | ((Elder* OR "aged people" OR "older adults") AND ("depressive symptoms" OR "Clinically Significant Depressive Symptoms" OR "depression" OR "major depressive episode" OR "unipolar depression")) AND ("longitudinal study" OR "cohort" OR "prevalence study" OR "incidence study")) |
| Web of Science |                                                                                                                                                                                                                                                                                     |
| Scopus         |                                                                                                                                                                                                                                                                                     |
| LILACS         |                                                                                                                                                                                                                                                                                     |
| Scielo         |                                                                                                                                                                                                                                                                                     |
| Cochrane       |                                                                                                                                                                                                                                                                                     |

The grey literature can be accessed by unfiltered search in some databases through conference proceedings, google scholar, monograph or thesis repositories, grey literature search websites such as the Canadian Agency for Health Technology Assessment,<sup>31</sup> and the references of the included studies. The last date for collecting the material was on the 31st of December, 2020.

### **Review and selection process of studies**

A total of five researchers will participate in this review and the whole process will be accompanied by face-to-face or virtual meetings, weekly or biweekly, for training, adjustments, as well as to dispel disagreements.

After using the aforementioned search strategy, Microsoft Excel will be used in order to make it possible to count the studies per base and remove duplicates. The selection of these studies will begin by paired and independent reading (two members of the group and a third participant will be responsible for dispel any disagreements found and maintaining the alignment of the eligibility criteria). The selection phase will be consisted of two moments sequentially: 1) reading the titles and abstracts; 2) reading the full text, counting the number of studies included for the next phase and those excluded with their justifications. These results will be demonstrated at the time of publication of the systematic review using the flowchart recommended by PRISMA.<sup>29</sup>

### **Data Extraction**

After selecting the studies, data extraction will occur in a paired and independent approach, using a third component to assess disagreements. The data to be extracted will be guided by the purpose of this study, associated with the eligibility criteria. Therefore, it should include data on the country from which the study was developed, population type and location, study design, inclusion and exclusion criteria, observation time,

1  
2  
3 sociodemographic characteristics at the first wave, predictive factors, and outcome  
4 variable characteristics, such as the nature of the variable, instrument, and values. These  
5 data will be arranged in a table, using Microsoft Excel.  
6  
7

### 8 9 **Evaluation of quality of the studies**

10  
11 This phase of the study is based on the evaluation of quality of the studies included  
12 by the paired process, and thus, the analysis of the risk of bias. For observational studies,  
13 it will be verified if they are cross-sectional or longitudinal studies, and for each of these,  
14 the quality assessment is guided by the evaluation of the representativeness of the  
15 sampling, the form of measurement, the comparison of exposed and unexposed, the  
16 observation of values related to the outcomes and the control of confounding factors.  
17  
18  
19  
20

21  
22 The assessment of quality will be evaluated by the chosen tool called Quality  
23 Assessment Tool for Observational Cohort and Cross-Sectional Studies.<sup>32</sup> It consists of  
24 14 items, to be also evaluated in a paired process, with a third member to dispel  
25 disagreements with 'yes', 'no' or 'other' (which includes 'cannot determine', 'not  
26 applicable', or 'not reported').  
27  
28  
29  
30

### 31 32 **Biases and heterogeneity**

33  
34 After the quantitative synthesis of the meta-analysis is done, we will evaluate  
35 heterogeneity, due to the variety of instruments customarily used to assess the outcome  
36 of the depressive spectrum, besides other possible differences in the studies analyzed. The  
37  $I^2$  test will be used, being admitted as heterogeneous if  $I^2$  values are above 50%. In case  
38 of heterogeneity, a subgroup analysis will be performed from the selection of certain  
39 included studies whose population or data of older people differ, such as countries  
40 separated into categories by socioeconomic differences according to the United Nations  
41 classification and aggregation methodology.  
42  
43  
44  
45  
46  
47

48  
49 Graphical techniques such as funnel charts or statistical techniques (depending on  
50 the nature of the variable) will be employed to evaluate publication bias.  
51

### 52 53 **Summary Data**

54  
55 In this stage, prevalence and incidence data of the depressive spectrum will be  
56 presented, as well as the associated factors or risk factors, respectively. This section  
57 corresponds to the meta-analysis itself, and if it is not possible, a narrative and qualitative  
58 synthesis will be made.  
59  
60

1  
2  
3 Different meta-analyses will be performed for the quantitative data from  
4 prevalence and incidence studies and according to the variability of the depressive  
5 spectrum, using aggregate data. For each study included in the meta-analysis, we will use  
6 the inverse-variance weighting method. It will be critical to assess the impact of  
7 heterogeneity, especially since there are so many ways to evaluate the depressive  
8 spectrum.  
9  
10  
11  
12

13  
14 The data will be analyzed by the software R Project and displayed in tables, which  
15 will contain the measures of frequency and effect, whether continuous or dichotomized,  
16 with exposure of the relative risk, odds ratio, or mean differences in case the depressive  
17 variable is presented in a continuous form. Furthermore, forest plot graphics may be  
18 presented.  
19  
20  
21  
22

### 23 **Reliance on the evidence found**

24  
25 The assessment of the quality of the evidence that will be included should be  
26 addressed by The Grading of Recommendations Assessment, Development and  
27 Evaluation (GRADE), which makes it possible to classify into reliable levels, evaluating  
28 whether the effect estimates are close to reality.  
29  
30  
31  
32

33 **Patient and Public Involvement:** No patient involved.  
34

### 35 **ETHICS AND DISSEMINATION**

36  
37 Formal ethical approval is not required on this research, since published studies with non-  
38 identifiable data will be used.  
39  
40  
41

42 **Amendments:** After approval of the protocol, any important amendments will be  
43 documented in the final publication; and if necessary, these amendments will be  
44 registered with PROSPERO.  
45  
46  
47

48 **Contributorship statement:** Conceptualization: LEEB, DLBdeS and JJ. Data analysis:  
49 LEEB, DLBdeS and JJ. Methodology and Project administration: LEEB, DLBdeS, JJ,  
50 ALP and MYM. Reading and final revision of the text; LEEB, DLBdeS, JJ, ALP and  
51 MYM. Research: all. Writing of the scientific paper: LEEB, DLBdeS, JJ, ALP and MYM.  
52  
53  
54  
55

56 **Competing interests:** None declared.  
57

58 **Funding:** This study was funded in part by the Coordenação de Aperfeiçoamento de  
59 Pessoal de Nível Superior – Brasil (CAPES) - Finance Code 001.  
60

## REFERENCES

1. UN. World population prospects 2019. New York: United Nations Population Division; 2019 [updated 28 August 2019. Online Edition, Rev. 1:[Available from: <https://population.un.org/wpp/Download/Standard/Population/> accessed 17 February 2021.
2. Lutz W, Sanderson W, Scherbov S. The coming acceleration of global population ageing. *Nature* 2008;451(7179):716-9. doi: 10.1038/nature06516
3. Beard JR, Officer A, de Carvalho IA, *et al.* The World report on ageing and health: a policy framework for healthy ageing. *Lancet* 2016;387(10033):2145-54. doi: 10.1016/S0140-6736(15)00516-4
4. Chang AY, Skirbekk VF, Tyrovolas S, *et al.* Measuring population ageing: an analysis of the Global Burden of Disease Study 2017. *Lancet Public Health* 2019;4(3):e159-e67. doi: 10.1016/S2468-2667(19)30019-2
5. Souza DLB, Oliveras-Fabregas A, Minobes-Molina E, *et al.* Trends of multimorbidity in 15 European countries: a population-based study in community-dwelling adults aged 50 and over. *BMC Public Health* 2021;21(1):76. doi: 10.1186/s12889-020-10084-x
6. Marengoni A, Angleman S, Melis R, *et al.* Aging with multimorbidity: a systematic review of the literature. *Ageing Res Rev* 2011;10(4):430-9. doi: 10.1016/j.arr.2011.03.003
7. Read JR, Sharpe L, Modini M, *et al.* Multimorbidity and depression: A systematic review and meta-analysis. *J Affect Disord* 2017;221:36-46. doi: 10.1016/j.jad.2017.06.009
8. Birk JL, Kronish IM, Moise N, *et al.* Depression and multimorbidity: Considering temporal characteristics of the associations between depression and multiple chronic diseases. *Health Psychol* 2019;38(9):802-11. doi: 10.1037/hea0000737
9. WHO. Depression and Other Common Mental Disorders: Global Health Estimates. In: Services DP, ed., 2017.
10. Ho C, Jin A, Nyunt MS, *et al.* Mortality rates in major and subthreshold depression: 10-year follow-up of a Singaporean population cohort of older adults. *Postgrad Med* 2016;128(7):642-7. doi: 10.1080/00325481.2016.1221319
11. Collard RM, Arts MHL, Schene AH, *et al.* The impact of frailty on depressive disorder in later life: Findings from the Netherlands Study of depression in older persons. *Eur Psychiatry* 2017;43:66-72. doi: 10.1016/j.eurpsy.2017.01.003
12. Rong J, Chen G, Wang X, *et al.* Correlation Between Depressive Symptoms And Quality Of Life, And Associated Factors For Depressive Symptoms Among Rural Elderly In Anhui, China. *Clin Interv Aging* 2019;14:1901-10. doi: 10.2147/CIA.S225141
13. Sivertsen H, Bjorklof GH, Engedal K, *et al.* Depression and Quality of Life in Older Persons: A Review. *Dement Geriatr Cogn Disord* 2015;40(5-6):311-39. doi: 10.1159/000437299
14. APA. Diagnostic and Statistical Manual of Mental disorders- DSM-5. 5th ed: American Psychiatric Association 2013:155-188.
15. Howard DM, Adams MJ, Clarke TK, *et al.* Genome-wide meta-analysis of depression identifies 102 independent variants and highlights the importance of the prefrontal brain regions. *Nat Neurosci* 2019;22(3):343-52. doi: 10.1038/s41593-018-0326-7
16. Hsueh YC, Chen CY, Hsiao YC, *et al.* A longitudinal, cross-lagged panel analysis of loneliness and depression among community-based older adults. *J Elder Abuse Negl* 2019;31(4-5):281-93. doi: 10.1080/08946566.2019.1660936
17. Nascimento KK, Pereira KS, Firmo JO, *et al.* Predictors of incidence of clinically significant depressive symptoms in the elderly: 10-year follow-up study of the Bambui cohort study of aging. *Int J Geriatr Psychiatry* 2015;30(12):1171-6. doi: 10.1002/gps.4271

18. Fiske A, Wetherell JL, Gatz M. Depression in older adults. *Annu Rev Clin Psychol* 2009;5:363-89. doi: 10.1146/annurev.clinpsy.032408.153621
19. Luppá M, Sikorski C, Luck T, *et al.* Age- and gender-specific prevalence of depression in latest-life--systematic review and meta-analysis. *J Affect Disord* 2012;136(3):212-21. doi: 10.1016/j.jad.2010.11.033
20. WHO. The ICD-10 classification of mental and behavioural disorders : clinical descriptions and diagnostic guidelines. 10<sup>a</sup> ed: World Health Organization 1992.
21. Eulalio MC, Andrade, T.F., Melo RL, *et al.* [Latent structure of depression in the elderly: a taxometric analysis]. *Cad Saude Publica* 2015;31(3):555-64. doi: 10.1590/0102-311x00028914
22. Beekman AT, Geerlings SW, Deeg DJ, *et al.* The natural history of late-life depression: a 6-year prospective study in the community. *Arch Gen Psychiatry* 2002;59(7):605-11. doi: 10.1001/archpsyc.59.7.605
23. Ayuso-Mateos JL, Nuevo R, Verdes E, *et al.* From depressive symptoms to depressive disorders: the relevance of thresholds. *Br J Psychiatry* 2010;196(5):365-71. doi: 10.1192/bjp.bp.109.071191
24. EN D, JL P-R. Qualidade de vida: comparação entre os idosos na comunidade e institucionalizados. *Revista Kairós- Gerontologia* 2018;21(1):37-54. doi: <https://doi.org/10.23925/2176-901X.2018v21i1p37-54>
25. Jerez-Roig J, de Medeiros JF, do Nascimento Moreira Fidelis K, *et al.* Activity Limitations in Brazilian Institutionalized Older Adults. *J Geriatr Phys Ther* 2017;40(4):214-22. doi: 10.1519/JPT.000000000000101
26. MF L-C, DL M, VP C, *et al.* 10-year trends in the health of Brazilian elderly: evidence from the National Household Sample Survey (PNAD 1998, 2003, 2008). *Ciencia & Saude Coletiva* 2011;16(9):3689-96. doi: <https://doi.org/10.1590/S1413-81232011001000006>
27. Melo-Silva AM, Mambrini JVM, Souza-Junior PRB, *et al.* Hospitalizações entre adultos mais velhos: resultados do ELSI-Brasil. *Revista Saúde Pública* 2018;52(Supl 2:3s.) doi: <https://doi.org/10.11606/S1518-8787.2018052000639>
28. Cole MG, Dendukuri N. Risk factors for depression among elderly community subjects: a systematic review and meta-analysis. *Am J Psychiatry* 2003;160(6):1147-56. doi: 10.1176/appi.ajp.160.6.1147
29. Moher D, Liberati A, Tetzlaff J, *et al.* Preferred reporting items for systematic reviews and meta-analyses: the PRISMA statement. *Int J Surg* 2010;8(5):336-41. doi: 10.1016/j.ijsu.2010.02.007
30. WHO. The uses of epidemiology in the study of the elderly. Report of a WHO Scientific Group on the Epidemiology of Aging. World Health Organ Tech Rep Ser. Geneva, 1984:1-84.
31. CADTH. Canadian Agency for Drugs and Technologies in Health; [updated May 8, 2019. Available from: <https://www.cadth.ca/resources/finding-evidence/grey-matters> accessed December 20 2020.
32. NIH. Study Quality Assessment Tools [Available from: <https://www.nhlbi.nih.gov/health-topics/study-quality-assessment-tools> accessed 5 February 2021.

| <b>PRISMA-P 2015 checklist: recommended items to include in a systematic review protocol</b> |                    |                                                                                                                                                                                                                           |                            |
|----------------------------------------------------------------------------------------------|--------------------|---------------------------------------------------------------------------------------------------------------------------------------------------------------------------------------------------------------------------|----------------------------|
| <b>Section/topic</b>                                                                         | <b>Number item</b> | <b>Checklist item</b>                                                                                                                                                                                                     | <b>Checking</b>            |
| <b>Title</b>                                                                                 |                    |                                                                                                                                                                                                                           |                            |
| • Identification                                                                             | 1a                 | Identify the report as a protocol of a systematic review                                                                                                                                                                  | Checked                    |
| • Update                                                                                     | 1b                 | If the protocol is for an update of a previous systematic review, identify as such                                                                                                                                        | Not necessary              |
| <b>Registration</b>                                                                          | 2                  | If registered, provide the name of the registry (e.g., PROSPERO) and registration number                                                                                                                                  | PROSPERO<br>CRD42019121616 |
| <b>Authors</b>                                                                               |                    |                                                                                                                                                                                                                           |                            |
| <b>Contact</b>                                                                               | 3a                 | Provide name, institutional affiliation, and e-mail address of all protocol authors; provide physical mailing address of corresponding author                                                                             | Checked                    |
| <b>Contributions</b>                                                                         | 3b                 | Describe contributions of protocol authors and identify the guarantor of the review                                                                                                                                       | Checked                    |
| <b>Amendments</b>                                                                            | 4                  | If the protocol represents an amendment of a previously completed or published protocol, identify as such and list changes; otherwise, state plan for documenting important protocol amendments                           | Checked                    |
| <b>Support</b>                                                                               |                    |                                                                                                                                                                                                                           |                            |
| • Sources                                                                                    | 5a                 | Indicate sources of financial or other support for the review                                                                                                                                                             | Checked                    |
| • Sponsor                                                                                    | 5b                 | Provide name for the review funder and/or sponsor                                                                                                                                                                         |                            |
| • Role of sponsor/<br>funder                                                                 | 5c                 | Describe roles of funder(s), sponsor(s), and/or institution(s), if any, in developing the protocol                                                                                                                        |                            |
| <b>INTRODUCTION</b>                                                                          |                    |                                                                                                                                                                                                                           |                            |
| <b>Rationale</b>                                                                             | 6                  | Describe the rationale for the review in the context of what is already known                                                                                                                                             | Checked                    |
| <b>Objectives</b>                                                                            | 7                  | Provide an explicit statement of the question(s) the review will address with reference to participants, interventions, comparators, and outcomes (PICO)                                                                  | Checked                    |
| <b>METHODS</b>                                                                               |                    |                                                                                                                                                                                                                           |                            |
| <b>Eligibility criteria</b>                                                                  | 8                  | Specify the study characteristics (e.g., PICO, study design, setting, time frame) and report characteristics (e.g., years considered, language, publication status) to be used as criteria for eligibility for the review | Checked                    |
| <b>Information sources</b>                                                                   | 9                  | Describe all intended information sources (e.g., electronic databases, contact with study authors, trial registers, or other grey literature sources) with planned dates of coverage                                      | Checked                    |
| <b>Search strategy</b>                                                                       | 10                 | Present draft of search strategy to be used for at least one electronic database, including planned limits, such that it could be repeated                                                                                | Checked                    |
| <b>Study records</b>                                                                         |                    |                                                                                                                                                                                                                           |                            |
| • Data management                                                                            | 11a                | Describe the mechanism(s) that will be used to manage records and data throughout the review                                                                                                                              | Checked                    |
| • Selection process                                                                          | 11b                | State the process that will be used for selecting studies (e.g., two independent reviewers) through each phase of the review (i.e., screening, eligibility, and inclusion in meta-analysis)                               | Checked                    |
| • Data collection process                                                                    | 11c                | Describe planned method of extracting data from reports (e.g., piloting forms, done independently, in duplicate), any processes for obtaining and confirming data from investigators                                      | Checked                    |
| <b>Data items</b>                                                                            | 12                 | List and define all variables for which data will be sought (e.g., PICO items, funding sources), any pre-planned data assumptions and simplifications                                                                     | Checked                    |
| <b>Outcomes and prioritization</b>                                                           | 13                 | List and define all outcomes for which data will be sought, including prioritization of main and additional outcomes, with rationale                                                                                      | Checked                    |
| <b>Risk of bias in individual studies</b>                                                    | 14                 | Describe anticipated methods for assessing risk of bias of individual studies, including whether this will be done at the outcome or study level, or both; state how this information will be used in data synthesis      | Checked                    |
| <b>Data</b>                                                                                  | 15a                | Describe criteria under which study data will be quantitatively synthesized                                                                                                                                               | Checked                    |

1  
2  
3  
4  
5  
6  
7  
8  
9  
10  
11  
12  
13  
14  
15  
16  
17  
18  
19  
20  
21  
22  
23  
24  
25  
26  
27  
28  
29  
30  
31  
32  
33  
34  
35  
36  
37  
38  
39  
40  
41  
42  
43  
44  
45  
46

|                                          |     |                                                                                                                                                                                                                                                      |         |
|------------------------------------------|-----|------------------------------------------------------------------------------------------------------------------------------------------------------------------------------------------------------------------------------------------------------|---------|
| <b>Synthesis</b>                         | 15b | If data are appropriate for quantitative synthesis, describe planned summary measures, methods of handling data, and methods of combining data from studies, including any planned exploration of consistency (e.g., I <sup>2</sup> , Kendall’s tau) |         |
|                                          | 15c | Describe any proposed additional analyses (e.g., sensitivity or subgroup analyses, meta-regression)                                                                                                                                                  |         |
|                                          | 15d | If quantitative synthesis is not appropriate, describe the type of summary planned                                                                                                                                                                   |         |
| <b>Meta-bias(es)</b>                     | 16  | Specify any planned assessment of meta-bias(es) (e.g., publication bias across studies, selective reporting within studies)                                                                                                                          | Checked |
| <b>Confidence in cumulative evidence</b> | 17  | Describe how the strength of the body of evidence will be assessed (e.g., GRADE)                                                                                                                                                                     | Checked |
|                                          |     |                                                                                                                                                                                                                                                      |         |

For peer review only



# BMJ Open

## INCIDENCE OF DEPRESSION, DEPRESSIVE SYMPTOMS AND ITS PREDICTIVE FACTORS IN A COMMUNITY-DWELLING OLDER ADULTS: A SYSTEMATIC REVIEW AND META-ANALYSIS PROTOCOL

|                                 |                                                                                                                                                                                                                                                                                                                                                                                                                                                                                                                                                                    |
|---------------------------------|--------------------------------------------------------------------------------------------------------------------------------------------------------------------------------------------------------------------------------------------------------------------------------------------------------------------------------------------------------------------------------------------------------------------------------------------------------------------------------------------------------------------------------------------------------------------|
| Journal:                        | <i>BMJ Open</i>                                                                                                                                                                                                                                                                                                                                                                                                                                                                                                                                                    |
| Manuscript ID                   | bmjopen-2021-052147.R1                                                                                                                                                                                                                                                                                                                                                                                                                                                                                                                                             |
| Article Type:                   | Protocol                                                                                                                                                                                                                                                                                                                                                                                                                                                                                                                                                           |
| Date Submitted by the Author:   | 09-Jun-2021                                                                                                                                                                                                                                                                                                                                                                                                                                                                                                                                                        |
| Complete List of Authors:       | Brasileiro, LÍzie Emanuelle Eulálio; Federal University of Rio Grande do Norte, Multicampi School of Medical Sciences de Medeiros Paiva, AÍlla Loreнна; Federal University of Rio Grande do Norte, Multicampi School of Medical Sciences Dantas de Medeiros, Maria Yasmin; Federal University of Rio Grande do Norte, Multicampi School of Medical Sciences Jerez-Roig, Javier; Federal University of Rio Grande do Norte, Department of Collective Health de Souza, Dyego; Federal University of Rio Grande do Norte, Postgraduate Programme in Collective Health |
| <b>Primary Subject Heading</b>: | Epidemiology                                                                                                                                                                                                                                                                                                                                                                                                                                                                                                                                                       |
| Secondary Subject Heading:      | Geriatric medicine                                                                                                                                                                                                                                                                                                                                                                                                                                                                                                                                                 |
| Keywords:                       | Depression & mood disorders < PSYCHIATRY, Old age psychiatry < PSYCHIATRY, EPIDEMIOLOGY, GERIATRIC MEDICINE                                                                                                                                                                                                                                                                                                                                                                                                                                                        |
|                                 |                                                                                                                                                                                                                                                                                                                                                                                                                                                                                                                                                                    |

SCHOLARONE™  
Manuscripts





I, the Submitting Author has the right to grant and does grant on behalf of all authors of the Work (as defined in the below author licence), an exclusive licence and/or a non-exclusive licence for contributions from authors who are: i) UK Crown employees; ii) where BMJ has agreed a CC-BY licence shall apply, and/or iii) in accordance with the terms applicable for US Federal Government officers or employees acting as part of their official duties; on a worldwide, perpetual, irrevocable, royalty-free basis to BMJ Publishing Group Ltd ("BMJ") its licensees and where the relevant Journal is co-owned by BMJ to the co-owners of the Journal, to publish the Work in this journal and any other BMJ products and to exploit all rights, as set out in our [licence](#).

The Submitting Author accepts and understands that any supply made under these terms is made by BMJ to the Submitting Author unless you are acting as an employee on behalf of your employer or a postgraduate student of an affiliated institution which is paying any applicable article publishing charge ("APC") for Open Access articles. Where the Submitting Author wishes to make the Work available on an Open Access basis (and intends to pay the relevant APC), the terms of reuse of such Open Access shall be governed by a Creative Commons licence – details of these licences and which [Creative Commons](#) licence will apply to this Work are set out in our licence referred to above.

Other than as permitted in any relevant BMJ Author's Self Archiving Policies, I confirm this Work has not been accepted for publication elsewhere, is not being considered for publication elsewhere and does not duplicate material already published. I confirm all authors consent to publication of this Work and authorise the granting of this licence.

1  
2  
3 1 INCIDENCE OF DEPRESSION, DEPRESSIVE SYMPTOMS AND ITS  
4 2 PREDICTIVE FACTORS IN A COMMUNITY-DWELLING OLDER ADULTS: A  
5 3 SYSTEMATIC REVIEW AND META-ANALYSIS PROTOCOL  
6  
7  
8 4

9 5 Lízie Emanuelle Eulálio Brasileiro<sup>1,2</sup>, Aílla Lorena de Medeiros Paiva<sup>2</sup>, Maria Yasmin  
10 6 Dantas de Medeiros<sup>2</sup>, Javier Jerez-Roig<sup>1,3</sup>, Dyego Leandro Bezerra de Souza<sup>1,3,4</sup>.

11 7 **Corresponding Author:** Javier Jerez-Roig, research group on Methodology, Methods,  
12 8 Models and Outcomes of Health and Social Sciences (M<sub>3</sub>O). Faculty of Health Sciences  
13 9 and Welfare. Centre for Health and Social Care Research (CESS). University of Vic-  
14 10 Central University of Catalonia (UVic-UCC), e-mail: javier.jerez@uvic.cat,  
15 11 +34938816025, C. Sagrada Família, 7, 08500 Vic, Spain.

16 12 **Author Affiliations:**

17 13 <sup>1</sup> Postgraduate Programme in Collective Health, Federal University of Rio Grande do  
18 14 Norte (UFRN), Natal-RN, Brazil

19 15 <sup>2</sup> Multicampi School of Medical Sciences, Federal University of Rio Grande do Norte  
20 16 (UFRN)

21 17 <sup>3</sup> Research group on Methodology, Methods, Models and Outcomes of Health and Social  
22 18 Sciences (M<sub>3</sub>O). Faculty of Health Sciences and Welfare. Centre for Health and Social  
23 19 Care Research (CESS). University of Vic-Central University of Catalonia (UVic-UCC).

24 20 <sup>4</sup> Department of Collective Health, Graduate Programme in Collective Health, Federal  
25 21 University of Rio Grande do Norte, Natal, Brazil

26 22 **ABSTRACT**

27 23 **Introduction** Faced with the continuous growth in the number of older people at a global  
28 24 level, some concerns are raised about the way people age. Health conditions such as  
29 25 depressive symptoms and depression have a direct or indirect impact on the quality of life  
30 26 of this population segment. The objective of this study is to verify the incidence of the  
31 27 various presentations of the depressive spectrum in the community-dwelling older  
32 28 population, as well as to analyze the predictive factors.

33 29 **Methods and analysis** This systematic review and meta-analysis protocol follows the  
34 30 recommendation of the Preferred Reporting Items for Systematic Reviews and Meta-  
35 31 Analyses Protocols. Searches will be conducted in *PubMed*, *Web of Science*, *Scopus*,  
36 32 *Lilacs*, *Scielo*, and *Cochrane* databases, as well as grey literature. The search strategy  
37 33 involves terms related to aging and the depressive spectrum found in observational  
38 34 studies. There will be no language restriction and the material included will be the ones  
39 35 whose publications took place until December 2020.

40 36 **Ethics and dissemination** Formal ethical approval is not required on this research, since  
41 37 it only aims secondary data. After publishing the results in a scientifically supported  
42 38 journal, our findings may be disseminated to fill in the gaps and guide the production of  
43 39 more effective public policies directed at a more adequate care to the older population at  
44 40 a global level. The search process began in January 2021 and it is expected that all stages  
45 41 of the review will be completed by November 30, 2021.

### Strengths and limitations of this study

- To the best of our knowledge, this is the first systematic review and meta-analysis to reveal data on incidence and risk factors of the depressive spectrum in community-dwelling older adults.
- This research adheres to the Preferred Reporting Items for Systematic reviews and Meta-Analyses guidelines for protocols (PRISMA-P).
- Heterogeneous data obtained for the depressive spectrum, may limit the performance of quantitative meta-analysis.
- Our choice not to limit time or language makes the data that will be obtained important from a public health perspective.

## INTRODUCTION

The number of people aged 65 and over, according to a United Nations report,<sup>1</sup> is expected to increase from 9% in 2019 to 16% in 2050. In addition to these projections, the rapid aging of the population is likely to continue until the middle of the 21st century<sup>2</sup>, which entails a greater need for societies to adapt. Such demographic changes demand a better dimensioning of the dynamics of aging, which includes an understanding of the relationship between greater longevity and the qualitative aspect of experiences. Studies show an opposite relationship: the longer one lives, the more difficult life experiences can be due to the progressive loss of physical, mental, and cognitive integrity.<sup>3 4</sup>

It is observed a tendency of growth in the prevalence of multimorbidity with the increase of age,<sup>5</sup> which is related to repercussions in the quality of life and functionality.<sup>6</sup> Little is known about the relationship between multimorbidity and depression. It has been noticed that people with multimorbidity present a two- to three- fold increase in the chance of having depression when compared to people who do not have it<sup>7</sup> and that depression seems to play a central role in the patterns of multimorbidity<sup>8</sup>.

Regarding depression, the World Health Organization<sup>9</sup> positions it as the single largest contributor to disability, besides its direct relationship with suicide deaths. Depression in the older population is associated with an increased risk of mortality,<sup>10</sup> along with the impact on functional capacity, fragility<sup>11</sup> and quality of life,<sup>12 13</sup> being considered as the single largest contributor to non-fatal health loss.<sup>9</sup> Among the age groups, a peak in the frequency of depression was detected between the age of 55 and 74 years,<sup>9</sup> which affects 7.5% of women and 5.5% of men, worldwide, a percentage that exceeds the other ages.

1  
2  
3 1 Clinical characteristics of depression include both psychological symptoms -  
4 2 sadness, lack of energy or decreased ability to feel pleasure - and physical and  
5 3 neurovegetative symptoms - such as fatigue, changes in sleep and appetite.<sup>14</sup> This range  
6 4 of symptoms is associated with neurochemical changes of a polygenic nature,<sup>15</sup> as well  
7 5 as more subjective factors that occur throughout life, such as bereavements and losses,  
8 6 individual coping capacity, social support, and loneliness.<sup>9 16 17</sup> This heterogeneous  
9 7 profile of the clinical manifestation of depression makes its study complex, especially  
10 8 when so many forms of presentation can occur.

11 9 When discussing depression in the scientific literature, particularly when  
12 10 conducting epidemiological studies, depression can take on several different  
13 11 presentations. The way depression has been researched entails a great variability in  
14 12 prevalence and incidence data, which makes the comprehension of the presentations  
15 13 important to be addressed. This variability in general is due to methodological  
16 14 differences: 1) how the depressive spectrum can be researched; 2) the housing profile of  
17 15 the older population.

18 16 In the first difference, the depressive spectrum is understood as the entire set of  
19 17 depressive categories, from the mildest depressive symptoms to the most severe, such as  
20 18 Major Depression.<sup>18 19</sup> There are two ways to research the depressive spectrum, either by  
21 19 categorization or by dimensional assessment. The categorization is determined by the  
22 20 American Psychiatric Association, in its 5th edition of the Diagnostic and Statistical  
23 21 Manual - DSM V,<sup>14</sup> or by the World Health Organization, by the International Code of  
24 22 Diseases 10th edition, ICD 10<sup>20</sup> in the so-called Depressive Disorders. For dimensionality  
25 23 assessment, depression scales quantify and establish a cut-off point, revealing what is  
26 24 known as clinically significant depressive symptoms (CSDS). This type of assessment of  
27 25 depression seems to have a good representation in its syndromic understanding.<sup>21</sup>

28 26 It is important to emphasize that both ways of assessing depression are relevant.  
29 27 Even when evaluating the CSDS, the so-called 'subclinical' depression, there is a tendency  
30 28 to chronicity and recurrence,<sup>11 22</sup> which entails the psychosocial repercussions.<sup>23</sup> In this  
31 29 regard, early detection should be a focus at the Primary Health Care level, with a view to  
32 30 the early establishment of interventions.<sup>23</sup>

33 31 As for the housing profile of the older population, it is known that those who live  
34 32 in their own homes have better quality of life indexes<sup>24</sup> and a better level of functionality

1 than the institutionalized<sup>25 26</sup> or hospitalized<sup>27</sup> older adults. Therefore, a systematic review  
 2 focusing on community-dwelling older adults intends to address a preventive perspective,  
 3 especially when involving studies of incidence and assessment of predictive factors of  
 4 depression.

5 Notwithstanding the review research carried out in 2003, which sought to evaluate  
 6 risk factors for depression,<sup>28</sup> there are no updated reviews or meta-analysis whose  
 7 population focus is community-dwelling adults aged 60 years or over, that particularly  
 8 bring incidence rates or reveal predictive factors. We hypothesize that sociodemographic  
 9 factors, health conditions, social support, functional disability, and some contextual  
 10 factors may predict the depressive spectrum in community-dwelling older adults.

11 The objective of this systematic review will be to ascertain the incidence in the  
 12 various presentations of the depressive spectrum in the community-dwelling older  
 13 population, as well as to analyze the predictive factors.

## 14 METHODS AND ANALYSIS

### 15 Study design and eligibility criteria

16 This research is a systematic review that includes observational studies whose  
 17 research questions should aim to assess the incidence of depression within its depressive  
 18 spectrum and its predictive factors. The protocol was registered with the International  
 19 Prospective Register of Systematic Reviews (PROSPERO) under the registration number  
 20 CRD42019121616.

21 As recommended by PRISMA- Preferred Reporting Items for Systematic  
 22 Reviews and Meta-Analyses,<sup>29</sup> systematic reviews should be guided by the acronym  
 23 PICO, representing the Participants, Intervention (in our case, we replace it by exposure  
 24 variables), Comparators, and Outcomes, which can be seen summarized in **table 1**.

25 **Table 1.** PICO- description

| Abbreviation | Meaning                 | Characteristics                                                                                         |
|--------------|-------------------------|---------------------------------------------------------------------------------------------------------|
| P            | Participants            | Community-dwelling adults $\geq 60$ years old                                                           |
| I            | Intervention (exposure) | Sociodemographic factors, health conditions, social support, functional disability, contextual factors. |
| C            | Comparators             | Group without the exposure variables                                                                    |
| O            | Outcomes                | Prevalence/incidence data of depression/Clinically significant depressive symptoms                      |

1  
2  
3 1 As defined by the World Health Organization,<sup>30</sup> individuals older than 65 years  
4 are considered old in developed countries, while the cut-off point decreases to 60 years  
5 2  
6 3 old in developing countries. Thus, we will include articles whose population focus should  
7  
8 4 be exclusively older adults, of both sexes, community-dwelling adults aged 60 years or  
9  
10 5 older, i.e., living in a home or residence, even if they live in houses with other older people  
11  
12 6 or receive specialized care, and therefore are not institutionalized or hospitalized.

13  
14 7 We will include the primary studies that deal with depression or clinically  
15  
16 8 significant depressive symptoms. To embrace the nomenclature used for depressive  
17  
18 9 spectrum, studies that research major depressive episode, major depressive disorder,  
19  
20 10 unipolar depression, dysthymia, minor depression, subclinical depression, and clinically  
21  
22 11 significant depressive symptoms (CSDS) will be included. This variable, related to the  
23  
24 12 depressive spectrum, will be treated as the dependent variable or the primary outcome.  
25  
26 13 Studies that include bipolar depression or depression with psychotic symptoms will be  
27  
28 14 excluded.

29 15 The evaluation of the predictive factors of depression or depressive symptoms will  
30  
31 16 be considered the independent variable and have been summarized in **table 1**. These  
32  
33 17 variables can be further broken down into others and will depend on the articles included  
34  
35 18 at the end of the Systematic Review. The factors hypothesized here to be predictive of the  
36  
37 19 depressive spectrum have been studied over time. For example, female gender and age  
38  
39 20 group within the older adults population among the *sociodemographic variables*,  
40  
41 21 comorbidities/multimorbidities or sphincter alterations as *health conditions*, lack of ties  
42  
43 22 with friends, family or loneliness as *social support*, losses or bereavements as *contextual*  
44  
45 23 *factors*, and, impairment in functionality as *functional disability*, which translates the  
46  
47 24 level of dependence.<sup>9 16 25 31</sup>

48 25 Regarding language, the team will include all studies that meet these eligibility  
49  
50 26 criteria, with no initial restriction for languages. considering that it could compromise the  
51  
52 27 more global intent of this systematic review protocol. Therefore, for articles whose  
53  
54 28 languages are not within the team's domain, the first attempt would be to look for  
55  
56 29 translators whose material is reliable. If this is not possible, the languages will include  
57  
58 30 articles in English, Spanish, Portuguese, and French, being recognized as a limitation of  
59  
60 31 the systematic review.



1  
2  
3 1 Studies that include blood, molecular or chemical element measurements will be  
4  
5 2 excluded. Studies investigating clinical populations in specific outpatient treatment or  
6  
7 3 presenting specific diseases will also be excluded.

#### 4 **Outcome measures**

5 The primary outcome can be subdivided into 1) Incidence of depression, by means  
6  
7 of measures of incidence rate or cumulative incidence of a major depressive episode or  
8  
9 of clinically significant depressive symptoms. If scales are used to measure the depressive  
10  
11 variable, they must be validated, and the final values can be displayed in a dichotomous  
12  
13 or continuous manner. Self-report measures of depression will not be accepted; 2)  
14  
15 Predictive factors of the depressive spectrum may be arranged in dichotomous values, to  
16  
17 be analyzed by measures of association with 95% CI (confidence interval).

18  
19 Furthermore, as a secondary outcome, longitudinal articles will be searched,  
20  
21 whose objectives seek to evaluate the trajectory of the depressive spectrum, through the  
22  
23 follow-up of symptom severity (measured with scales) or depression, by means of the  
24  
25 Diagnostic and Statistical Manual of Mental Disorders, Fifth Edition (DSM-V) and  
26  
27 International Classification of Diseases, 10th revision (ICD-10), and its associated  
28  
29 variables.  
30  
31  
32  
33  
34  
35  
36

#### 37 **Information source and search strategy**

38  
39 Six health-related databases were used: PubMed, Web of Science, Scopus,  
40  
41 LILACS (Latin-American and Caribbean Literature on Health Sciences), SciELO  
42  
43 (Scientific Electronic Library Online) and Cochrane. In addition to these bases, materials  
44  
45 from the grey literature will be used, represented by repositories of monographs or theses,  
46  
47 publications in Congresses and Google Scholar.

48  
49 Despite the possibility of using filters tools in advanced searches in the various  
50  
51 databases, the authors have decided not to include in the search strategy step the filters of  
52  
53 document types, languages, and types of studies, since the search was intended to be  
54  
55 exhaustive. We have established the best possible search strategy so that more relevant  
56  
57 studies could emerge within the theme, using several combinations of descriptors and key  
58  
59 words in the equation. Regarding the use of the associated terms 'prevalence study' OR  
60  
'incidence study', compared to the search strategy that used only 'incidence study', no

1 considerable difference was observed between the results of the different searches in the  
2 quantity of articles per database. Thus, we have opted to use the first association,  
3 anticipating that the differentiation between cross-sectional and longitudinal studies  
4 would be left to be done in the peer review phase.

5 Considering the search strategy for this study, literature search strategies were  
6 developed using medical subject headings (MeSH) and text words related to the  
7 population, depressive spectrum, and the type of study, forming an equation that  
8 respected the search form and technique in each base, according to **Table 2**.

**Table 2- Search strategies for each database**

| Databases                                                          | General search strategy                                                                                                                                                                                                                                                            |
|--------------------------------------------------------------------|------------------------------------------------------------------------------------------------------------------------------------------------------------------------------------------------------------------------------------------------------------------------------------|
| PubMed<br>Web of Science<br>Scopus<br>LILACS<br>Scielo<br>Cochrane | ((Elder* OR "aged people" OR "older adults") AND ("depressive symptoms" OR "Clinically Significant Depressive Symptoms" OR "depression" OR "major depressive episode" OR "unipolar depression") AND ("longitudinal study" OR "cohort" OR "prevalence study" OR "incidence study")) |

9  
10 In the spirit of including as much relevant material as possible, studies that answer  
11 the research question and are listed in their references will be included in the screening.  
12 For papers that may not be found in their complete form, we will establish communication  
13 with each lead author so that the material can be properly evaluated according to the  
14 eligibility criteria.

15 The grey literature can be accessed by unfiltered search in some databases through  
16 conference proceedings, google scholar, monograph or thesis repositories, grey literature  
17 search websites such as the Canadian Agency for Health Technology Assessment,<sup>32</sup> and  
18 the references of the included studies. The last date for collecting the material was on the  
19 31st of December, 2020.

## 20 **Review and selection process of studies**

21 A total of seven researchers will participate in this review and the whole process  
22 will be accompanied by face-to-face or virtual meetings, weekly or biweekly, for training,  
23 adjustments, as well as to dispel disagreements.

24 After using the aforementioned search strategy, Microsoft Excel will be used in  
25 order to make it possible to count the studies per base and remove duplicates. The



1  
2  
3 1 selection of these studies will begin by peer review and independent reading (two  
4 2 members of the group and a third participant will be responsible for dispel any  
5 3 disagreements found and maintaining the alignment of the eligibility criteria). The  
6 4 selection phase will be consisted of two moments sequentially: 1) reading the titles and  
7 5 abstracts; 2) reading the full text, counting the number of studies included for the next  
8 6 phase and those excluded with their justifications. These results will be demonstrated at  
9 7 the time of publication of the systematic review using the flowchart recommended by  
10 8 PRISMA.<sup>29</sup>

### 9 **Data Extraction**

10 After selecting the studies, data extraction will occur in a paired and independent  
11 approach, using a third component to assess disagreements. The data to be extracted will  
12 be guided by the purpose of this study, associated with the eligibility criteria. Therefore,  
13 it should include data on the country from which the study was developed, population  
14 type and location, study design, inclusion and exclusion criteria, observation time,  
15 sociodemographic characteristics at the first wave, predictive factors, and outcome  
16 variable characteristics, such as the nature of the variable, instrument, and values. These  
17 data will be arranged in a table, using Microsoft Excel.

### 18 **Evaluation of quality of the studies**

19 This phase of the study is based on the evaluation of quality of the studies included  
20 by peer review, and thus, the analysis of the risk of bias. The quality assessment will be  
21 guided by the evaluation of the representativeness of the sampling, the form of  
22 measurement, the comparison of exposed and unexposed, the observation of values  
23 related to the outcomes and the control of confounding factors.

24 The assessment of quality will be evaluated by the chosen tool called Quality  
25 Assessment Tool for Observational Cohort and Cross-Sectional Studies.<sup>33</sup> It consists of  
26 14 items, to be also evaluated in a peer review, with a third member to dispel  
27 disagreements with 'yes', 'no' or 'other' (which includes 'cannot determine', 'not  
28 applicable', or 'not reported').

### 29 **Biases and heterogeneity**

30 After the quantitative synthesis of the meta-analysis is done, we will evaluate  
31 heterogeneity, due to the variety of instruments customarily used to assess the outcome

1  
2  
3 1 of the depressive spectrum, besides other possible differences in the studies analyzed. The  
4  
5 2 I<sup>2</sup> test will be used, being admitted as heterogeneous if I<sup>2</sup> values are above 50%. In case  
6  
7 3 of heterogeneity, a subgroup analysis will be performed from the selection of certain  
8  
9 4 included studies whose population or data of older people differ, such as countries  
10  
11 5 separated into categories by socioeconomic differences according to the United Nations  
12  
13 6 classification and aggregation methodology.

14 7 Graphical techniques such as funnel charts or statistical techniques (depending on  
15  
16 8 the nature of the variable) will be employed to evaluate publication bias.

### 17 18 9 **Summary Data**

19  
20  
21 10 In this stage, incidence data of the depressive spectrum will be presented, as well  
22  
23 11 as the risk factors. This section corresponds to the meta-analysis itself, and if it is not  
24  
25 12 possible, a narrative and qualitative synthesis will be made.

26  
27 13 Different meta-analyses will be performed for the quantitative data incidence  
28  
29 14 studies and according to the variability of the depressive spectrum, using aggregate data.  
30  
31 15 For each study included in the meta-analysis, we will use the inverse-variance weighting  
32  
33 16 method. It will be critical to assess the impact of heterogeneity, especially since there are  
34  
35 17 so many ways to evaluate the depressive spectrum.

36  
37 18 The data will be analyzed by the software R Project and displayed in tables, which  
38  
39 19 will contain the measures of frequency and effect, whether continuous or dichotomized,  
40  
41 20 with exposure of the relative risk, odds ratio, or mean differences in case the depressive  
42  
43 21 variable is presented in a continuous form. Furthermore, forest plot graphics may be  
44  
45 22 presented.

### 46 47 23 **Reliance on the evidence found**

48  
49 24 The assessment of the quality of the evidence that will be included should be  
50  
51 25 addressed by The Grading of Recommendations Assessment, Development and  
52  
53 26 Evaluation (GRADE), which makes it possible to classify into reliable levels, evaluating  
54  
55 27 whether the effect estimates are close to reality.

56  
57 28 **Patient and Public Involvement:** No patient involved.

### 58 59 29 **ETHICS AND DISSEMINATION**

60

1  
2  
3 1 Formal ethical approval is not required on this research, since published studies  
4 2 with non-identifiable data will be used. It is known that a systematic review and meta-  
5 3 analysis follow a series of steps, respecting methodological rigor and synthesizing  
6 4 scientific evidence reliably. After publication of the final report of this material in a  
7 5 scientifically supported journal, the results can provide a global picture of the depressive  
8 6 spectrum in the community-dwelling older adults population, highlighting similarities  
9 7 between the different locations, as well as the differences. The epidemiological aspects  
10 8 found may fill current gaps and encourage the development of public policies focused on  
11 9 the health of older adults, especially for the group with lower vulnerability. Moreover,  
12 10 with the dissemination of the results, more studies can be done with the intention of  
13 11 understanding the impact of the insertion of new tools in health care for older adults.

12 **Amendments:** After approval of the protocol, any important amendments will be  
13 13 documented in the final publication; and if necessary, these amendments will be  
14 14 registered with PROSPERO.

15  
16 **Contributorship statement:** JJ is the guarantor. Conceptualization: LEEB, DLBdeS and  
17 17 JJ. Data analysis: LEEB, DLBdeS and JJ. Methodology and Project administration:  
18 18 LEEB, DLBdeS, JJ. ALP and MYM. Reading and final revision of the text; LEEB,  
19 19 DLBdeS, JJ, ALP and MYM. Research: all. Writing of the scientific paper: LEEB,  
20 20 DLBdeS, JJ, ALP and MYM.

21 **Competing interests:** None declared.

22 **Funding:** This study was funded in part by the Coordenação de Aperfeiçoamento de  
23 23 Pessoal de Nível Superior – Brasil (CAPES) - Finance Code 001. CAPES will only be  
24 24 responsible for financing the publication fee in the journal, and therefore is not involved  
25 25 in any other aspect of the project, such as the design of the project's protocol, analysis  
26 26 plan, collection and analyses.

## 27 REFERENCES

- 28 1. UN. World population prospects 2019. New York: United Nations Population Division;  
29 2019 [updated 28 August 2019. Online Edition, Rev. 1:[Available from:  
30 30 <https://population.un.org/wpp/Download/Standard/Population/> accessed 17 February  
31 31 2021.  
32 32 2. Lutz W, Sanderson W, Scherbov S. The coming acceleration of global population  
33 33 ageing. *Nature* 2008;451(7179):716-9. doi: 10.1038/nature06516

- 1 3. Beard JR, Officer A, de Carvalho IA, *et al.* The World report on ageing and health: a  
2 policy framework for healthy ageing. *Lancet* 2016;387(10033):2145-54. doi:  
3 10.1016/S0140-6736(15)00516-4
- 4 4. Chang AY, Skirbekk VF, Tyrovolas S, *et al.* Measuring population ageing: an analysis of  
5 the Global Burden of Disease Study 2017. *Lancet Public Health* 2019;4(3):e159-e67.  
6 doi: 10.1016/S2468-2667(19)30019-2
- 7 5. Souza DLB, Oliveras-Fabregas A, Minobes-Molina E, *et al.* Trends of multimorbidity in  
8 15 European countries: a population-based study in community-dwelling adults aged  
9 50 and over. *BMC Public Health* 2021;21(1):76. doi: 10.1186/s12889-020-10084-x
- 10 6. Marengoni A, Angleman S, Melis R, *et al.* Aging with multimorbidity: a systematic  
11 review of the literature. *Ageing Res Rev* 2011;10(4):430-9. doi:  
12 10.1016/j.arr.2011.03.003
- 13 7. Read JR, Sharpe L, Modini M, *et al.* Multimorbidity and depression: A systematic  
14 review and meta-analysis. *J Affect Disord* 2017;221:36-46. doi:  
15 10.1016/j.jad.2017.06.009
- 16 8. Birk JL, Kronish IM, Moise N, *et al.* Depression and multimorbidity: Considering  
17 temporal characteristics of the associations between depression and multiple chronic  
18 diseases. *Health Psychol* 2019;38(9):802-11. doi: 10.1037/hea0000737
- 19 9. WHO. Depression and Other Common Mental Disorders: Global Health Estimates. In:  
20 Services DP, ed., 2017.
- 21 10. Ho C, Jin A, Nyunt MS, *et al.* Mortality rates in major and subthreshold depression: 10-  
22 year follow-up of a Singaporean population cohort of older adults. *Postgrad Med*  
23 2016;128(7):642-7. doi: 10.1080/00325481.2016.1221319
- 24 11. Collard RM, Arts MHL, Schene AH, *et al.* The impact of frailty on depressive disorder in  
25 later life: Findings from the Netherlands Study of depression in older persons. *Eur*  
26 *Psychiatry* 2017;43:66-72. doi: 10.1016/j.eurpsy.2017.01.003
- 27 12. Rong J, Chen G, Wang X, *et al.* Correlation Between Depressive Symptoms And Quality  
28 Of Life, And Associated Factors For Depressive Symptoms Among Rural Elderly In  
29 Anhui, China. *Clin Interv Aging* 2019;14:1901-10. doi: 10.2147/CIA.S225141
- 30 13. Sivertsen H, Bjorklof GH, Engedal K, *et al.* Depression and Quality of Life in Older  
31 Persons: A Review. *Dement Geriatr Cogn Disord* 2015;40(5-6):311-39. doi:  
32 10.1159/000437299
- 33 14. APA. Diagnostic and Statistical Manual of Mental disorders- DSM-5. 5th ed: American  
34 Psychiatric Association 2013:155-188.
- 35 15. Howard DM, Adams MJ, Clarke TK, *et al.* Genome-wide meta-analysis of depression  
36 identifies 102 independent variants and highlights the importance of the prefrontal  
37 brain regions. *Nat Neurosci* 2019;22(3):343-52. doi: 10.1038/s41593-018-0326-7
- 38 16. Hsueh YC, Chen CY, Hsiao YC, *et al.* A longitudinal, cross-lagged panel analysis of  
39 loneliness and depression among community-based older adults. *J Elder Abuse Negl*  
40 2019;31(4-5):281-93. doi: 10.1080/08946566.2019.1660936
- 41 17. Nascimento KK, Pereira KS, Firmo JO, *et al.* Predictors of incidence of clinically  
42 significant depressive symptoms in the elderly: 10-year follow-up study of the Bambui  
43 cohort study of aging. *Int J Geriatr Psychiatry* 2015;30(12):1171-6. doi:  
44 10.1002/gps.4271
- 45 18. Fiske A, Wetherell JL, Gatz M. Depression in older adults. *Annu Rev Clin Psychol*  
46 2009;5:363-89. doi: 10.1146/annurev.clinpsy.032408.153621
- 47 19. Luppá M, Sikorski C, Luck T, *et al.* Age- and gender-specific prevalence of depression in  
48 latest-life--systematic review and meta-analysis. *J Affect Disord* 2012;136(3):212-21.  
49 doi: 10.1016/j.jad.2010.11.033
- 50 20. WHO. The ICD-10 classification of mental and behavioural disorders : clinical  
51 descriptions and diagnostic guidelines. 10<sup>a</sup> ed: World Health Organization 1992.

1  
2  
3  
4  
5  
6  
7  
8  
9  
10  
11  
12  
13  
14  
15  
16  
17  
18  
19  
20  
21  
22  
23  
24  
25  
26  
27  
28  
29  
30  
31  
32  
33  
34  
35  
36  
37  
38  
39  
40  
41  
42  
43  
44  
45  
46  
47  
48  
49  
50  
51  
52  
53  
54  
55  
56  
57  
58  
59  
60

- 1 21. Eulalio MC, Andrade, T.F., Melo RL, *et al.* [Latent structure of depression in the elderly: a taxometric analysis]. *Cad Saude Publica* 2015;31(3):555-64. doi: 10.1590/0102-311x00028914
- 2 22. Beekman AT, Geerlings SW, Deeg DJ, *et al.* The natural history of late-life depression: a 6-year prospective study in the community. *Arch Gen Psychiatry* 2002;59(7):605-11. doi: 10.1001/archpsyc.59.7.605
- 3 23. Ayuso-Mateos JL, Nuevo R, Verdes E, *et al.* From depressive symptoms to depressive disorders: the relevance of thresholds. *Br J Psychiatry* 2010;196(5):365-71. doi: 10.1192/bjp.bp.109.071191
- 4 24. Dias E, Pais-Ribeiro J. Qualidade de vida: comparação entre os idosos na comunidade e institucionalizados. *Revista Kairós- Gerontologia* 2018;21(1):37-54. doi: <https://doi.org/10.23925/2176-901X.2018v21i1p37-54>
- 5 25. Jerez-Roig J, de Medeiros JF, do Nascimento Moreira Fidelis K, *et al.* Activity Limitations in Brazilian Institutionalized Older Adults. *J Geriatr Phys Ther* 2017;40(4):214-22. doi: 10.1519/JPT.000000000000101
- 6 26. Lima-Costa M, Matos D, Camargos V, *et al.* 10-year trends in the health of Brazilian elderly: evidence from the National Household Sample Survey (PNAD 1998, 2003, 2008). *Ciencia & Saude Coletiva* 2011;16(9):3689-96. doi: <https://doi.org/10.1590/S1413-81232011001000006>
- 7 27. Melo-Silva AM, Mambrini JVM, Souza-Junior PRB, *et al.* Hospitalizações entre adultos mais velhos: resultados do ELSI-Brasil. *Revista Saúde Pública* 2018;52(Supl 2:3s.) doi: <https://doi.org/10.11606/S1518-8787.2018052000639>
- 8 28. Cole MG, Dendukuri N. Risk factors for depression among elderly community subjects: a systematic review and meta-analysis. *Am J Psychiatry* 2003;160(6):1147-56. doi: 10.1176/appi.ajp.160.6.1147
- 9 29. Moher D, Liberati A, Tetzlaff J, *et al.* Preferred reporting items for systematic reviews and meta-analyses: the PRISMA statement. *Int J Surg* 2010;8(5):336-41. doi: 10.1016/j.ijsu.2010.02.007
- 10 30. WHO. The uses of epidemiology in the study of the elderly. Report of a WHO Scientific Group on the Epidemiology of Aging. World Health Organ Tech Rep Ser. Geneva, 1984:1-84.
- 11 31. Souza DLBd, Oliveras-Fabregas A, Espelt A, *et al.* Multimorbidity and its associated factors among adults aged 50 and over: A cross-sectional study in 17 European countries. *Plos One* 2021;16(2) doi: 10.1371/journal.pone.0246623
- 12 32. CADTH. Canadian Agency for Drugs and Technologies in Health; [updated May 8, 2019. Available from: <https://www.cadth.ca/resources/finding-evidence/grey-matters> accessed December 20 2020.
- 13 33. NIH. Study Quality Assessment Tools [Available from: <https://www.nlm.nih.gov/health-topics/study-quality-assessment-tools> accessed 5 February 2021.

| <b>PRISMA-P 2015 checklist: recommended items to include in a systematic review protocol</b> |                    |                                                                                                                                                                                                                           |                                                                     |
|----------------------------------------------------------------------------------------------|--------------------|---------------------------------------------------------------------------------------------------------------------------------------------------------------------------------------------------------------------------|---------------------------------------------------------------------|
| <b>Section/topic</b>                                                                         | <b>Number item</b> | <b>Checklist item</b>                                                                                                                                                                                                     | <b>Checking</b>                                                     |
| <b>Title</b>                                                                                 |                    |                                                                                                                                                                                                                           |                                                                     |
| • Identification                                                                             | 1a                 | Identify the report as a protocol of a systematic review                                                                                                                                                                  | Page 1, lines 1-3                                                   |
| • Update                                                                                     | 1b                 | If the protocol is for an update of a previous systematic review, identify as such                                                                                                                                        | Not necessary                                                       |
| <b>Registration</b>                                                                          | 2                  | If registered, provide the name of the registry (e.g., PROSPERO) and registration number                                                                                                                                  | Page 4, line 18-20                                                  |
| <b>Authors</b>                                                                               |                    |                                                                                                                                                                                                                           |                                                                     |
| <b>Contact</b>                                                                               | 3a                 | Provide name, institutional affiliation, and e-mail address of all protocol authors; provide physical mailing address of corresponding author                                                                             | Page 1, line 5-24                                                   |
| <b>Contributions</b>                                                                         | 3b                 | Describe contributions of protocol authors and identify the guarantor of the review                                                                                                                                       | Page 10 lines 16-20                                                 |
| <b>Amendments</b>                                                                            | 4                  | If the protocol represents an amendment of a previously completed or published protocol, identify as such and list changes; otherwise, state plan for documenting important protocol amendments                           | Page 10, line 12-14                                                 |
| <b>Support</b>                                                                               |                    |                                                                                                                                                                                                                           |                                                                     |
| • Sources                                                                                    | 5a                 | Indicate sources of financial or other support for the review                                                                                                                                                             | Page 10, line 22-26                                                 |
| • Sponsor                                                                                    | 5b                 | Provide name for the review funder and/or sponsor                                                                                                                                                                         |                                                                     |
| • Role of sponsor/funder                                                                     | 5c                 | Describe roles of funder(s), sponsor(s), and/or institution(s), if any, in developing the protocol                                                                                                                        |                                                                     |
| <b>INTRODUCTION</b>                                                                          |                    |                                                                                                                                                                                                                           |                                                                     |
| <b>Rationale</b>                                                                             | 6                  | Describe the rationale for the review in the context of what is already known                                                                                                                                             | Page 2 (line 3) to Page 4 (Line 8)                                  |
| <b>Objectives</b>                                                                            | 7                  | Provide an explicit statement of the question(s) the review will address with reference to participants, interventions, comparators, and outcomes (PICO)                                                                  | Page 4, line 8-13                                                   |
| <b>METHODS</b>                                                                               |                    |                                                                                                                                                                                                                           |                                                                     |
| <b>Eligibility criteria</b>                                                                  | 8                  | Specify the study characteristics (e.g., PICO, study design, setting, time frame) and report characteristics (e.g., years considered, language, publication status) to be used as criteria for eligibility for the review | Page 4 (line 16) to Page 6 (line 3)- summarized information table 1 |
| <b>Information sources</b>                                                                   | 9                  | Describe all intended information sources (e.g., electronic databases, contact with study authors, trial registers, or other grey literature sources) with planned dates of coverage                                      | Page 6 (line 19) to Page 7 (line 19)                                |
| <b>Search strategy</b>                                                                       | 10                 | Present draft of search strategy to be used for at least one electronic database, including planned limits, such that it could be repeated                                                                                | Table 2 (Page 7)                                                    |
| <b>Study records</b>                                                                         |                    |                                                                                                                                                                                                                           |                                                                     |
| • Data management                                                                            | 11a                | Describe the mechanism(s) that will be used to manage records and data throughout the review                                                                                                                              | Page 7 (line 20) to Page 8 (line 8)                                 |
| • Selection process                                                                          | 11b                | State the process that will be used for selecting studies (e.g., two independent reviewers) through each phase of the review (i.e., screening, eligibility, and inclusion in meta-analysis)                               | Page 7 (line 20) to Page 8 (line 8)                                 |
| • Data collection process                                                                    | 11c                | Describe planned method of extracting data from reports (e.g., piloting forms, done independently, in duplicate), any processes for obtaining and confirming data from investigators                                      | Page 8 (line 9-17)                                                  |
| <b>Data items</b>                                                                            | 12                 | List and define all variables for which data will be sought (e.g., PICO items, funding sources), any pre-planned data assumptions and simplifications                                                                     | Page 5, lines 7-24                                                  |
| <b>Outcomes and prioritization</b>                                                           | 13                 | List and define all outcomes for which data will be sought, including prioritization of main and additional outcomes, with rationale                                                                                      | Page 6, Line 5-17                                                   |
| <b>Risk of bias in individual studies</b>                                                    | 14                 | Describe anticipated methods for assessing risk of bias of individual studies, including whether this will be done at the outcome or study level, or both; state how this information will be used in data synthesis      | Page 8 (line 29) to page 9 (line 6)                                 |

1  
2  
3  
4  
5  
6  
7  
8  
9  
10  
11  
12  
13  
14  
15  
16  
17  
18  
19  
20  
21  
22  
23  
24  
25  
26  
27  
28  
29  
30  
31  
32  
33  
34  
35  
36  
37  
38  
39  
40  
41  
42  
43  
44  
45  
46

|                                          |     |                                                                                                                                                                                                                                         |                    |
|------------------------------------------|-----|-----------------------------------------------------------------------------------------------------------------------------------------------------------------------------------------------------------------------------------------|--------------------|
| <b>Data Synthesis</b>                    | 15a | Describe criteria under which study data will be quantitatively synthesized                                                                                                                                                             | Page 9, Line 9-22  |
|                                          | 15b | If data are appropriate for quantitative synthesis, describe planned summary measures, methods of handling data, and methods of combining data from studies, including any planned exploration of consistency (e.g., I2, Kendall’s tau) |                    |
|                                          | 15c | Describe any proposed additional analyses (e.g., sensitivity or subgroup analyses, meta-regression)                                                                                                                                     |                    |
|                                          | 15d | If quantitative synthesis is not appropriate, describe the type of summary planned                                                                                                                                                      |                    |
| <b>Meta-bias(es)</b>                     | 16  | Specify any planned assessment of meta-bias(es) (e.g., publication bias across studies, selective reporting within studies)                                                                                                             | Page 9, line 7,8   |
| <b>Confidence in cumulative evidence</b> | 17  | Describe how the strength of the body of evidence will be assessed (e.g., GRADE)                                                                                                                                                        | Page 9, line 23-27 |
|                                          |     |                                                                                                                                                                                                                                         |                    |

For peer review only
